# Supplementary material for: Large-scale Proteomic and Phosphoproteomic Analyses of Maize Seedling Leaves During De-etiolation
Source: PubMed Central journal article supplement (PMC8242269; doi:10.1016/j.gpb.2020.12.004), 2020-12-30

Replicate 1

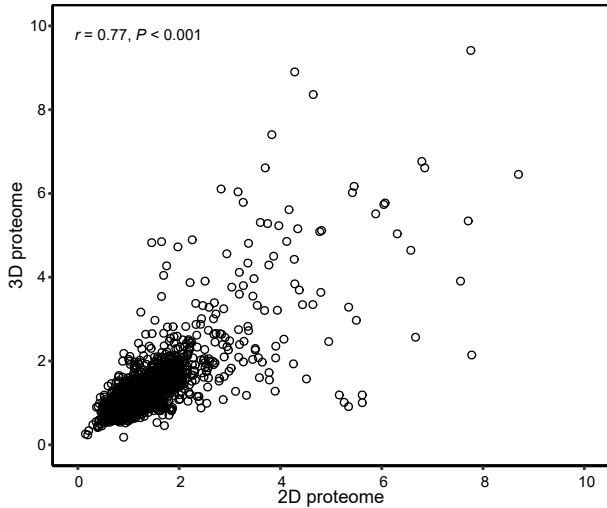

Replicate 2

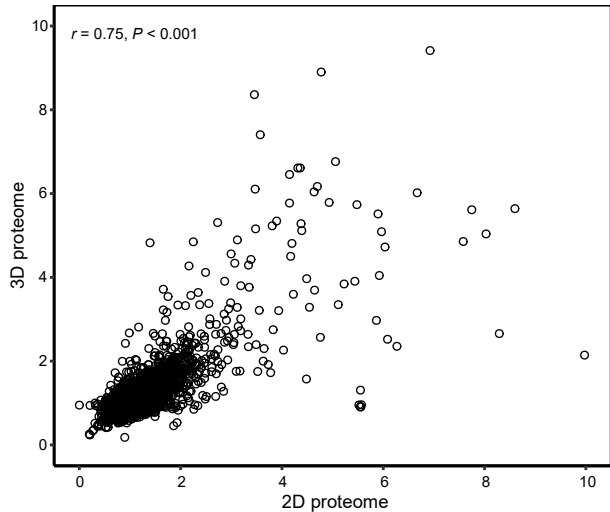

Supplement: mmc1.pdf [file mmc1.pdf]
