# Supplementary material for: Large-scale Proteomic and Phosphoproteomic Analyses of Maize Seedling Leaves During De-etiolation
Source: PubMed Central journal article supplement (PMC8242269; doi:10.1016/j.gpb.2020.12.004), 2020-12-30

GRMZM2G039828\_P01 1 MAAQEQQEQEQEKQQAKTSTTSSLPSSESSERSSSSARN---NLTEGGAESDEEIRRVPDMGG 57  
 GRMZM2G137046\_P01 1 -----MDEQAASSRPFSSSERSSSSGHHVDMEVKEG-MESDDEIRRVPDELGL 45  
 GRMZM2G171912\_P01 1 MAAQEQQEHE--KQQAKTSTTSSLPSSESSERSSSSAPN---NLREGGVESEDEEIRRVPDELGG 55

GRMZM2G039828\_P01

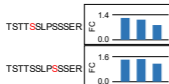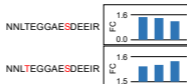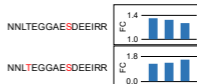

GRMZM2G137046\_P01

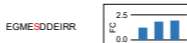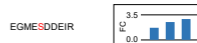

GRMZM2G171912\_P01

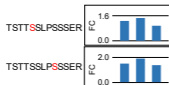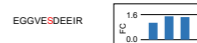

Supplement: mmc2.pdf [file mmc2.pdf]
