# Supplementary material for: Large-scale Proteomic and Phosphoproteomic Analyses of Maize Seedling Leaves During De-etiolation
Source: PubMed Central journal article supplement (PMC8242269; doi:10.1016/j.gpb.2020.12.004), 2020-12-30

## A TFs with altered protein abundance

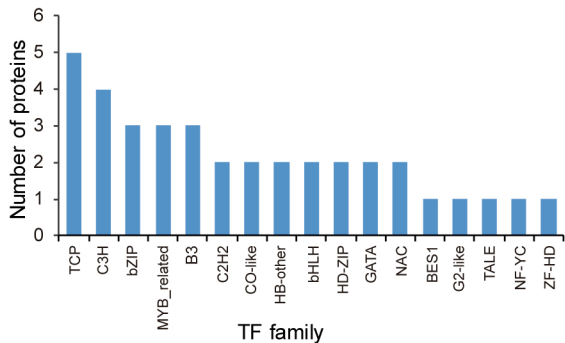

## C TFs with altered phosphorylation level

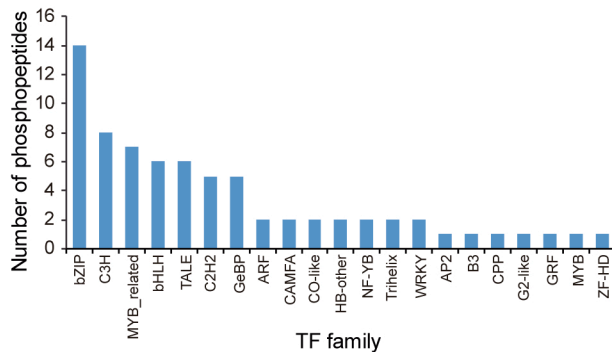

## B Heatmap of TFs with altered protein abundance

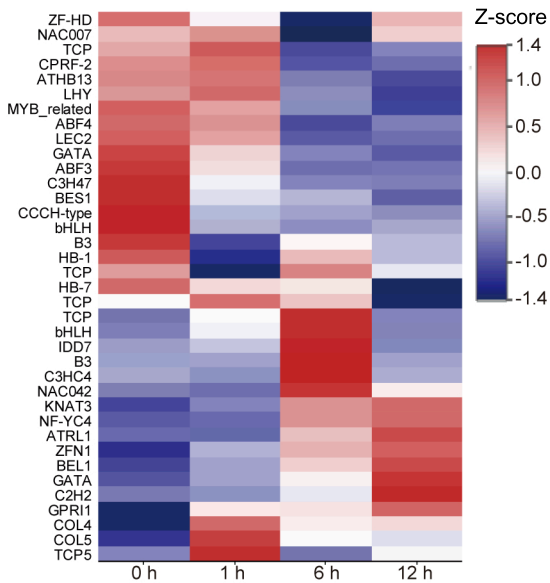

## D Heatmap of TFs with altered phosphorylation level

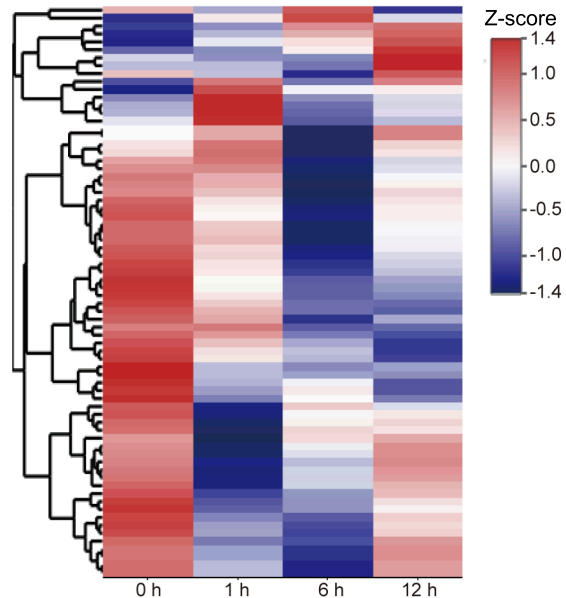

Supplement: mmc4.pdf [file mmc4.pdf]
