# Supplementary material for: Large-scale Proteomic and Phosphoproteomic Analyses of Maize Seedling Leaves During De-etiolation
Source: PubMed Central journal article supplement (PMC8242269; doi:10.1016/j.gpb.2020.12.004), 2020-12-30
Supplement: mmc5.pdf [file mmc5.pdf]

AT2G18790.1 M V S V G V G G - S G G G R G G R G G E E P S S S H T P N N R R G G E Q A Q S S G T K S L R P R S T E S M S K A I Q Y T V D A R L H A V F E Q S G A S G K 79  
GRMZM2G092174\_P01 M A S D S R P - P K R S P S - A R R V A P R H A H H S - Q S S G G S T S R A G A Q G G G G A A A T E S Y S K A V A Q Y N L D A R L H A V F E Q S G A S G R 77  
GRMZM2G124532\_P03 M A S G S R A T P T R S P S A R P E A P R H A H H H S Q S S G G S T S R A G - - - - G G A A T E S V S K A V A Q Y T L D A R L H A V F E Q S G A S G R 75

Seq 86

AT2G18790.1 S F D Y S Q S L K T T T Y G S S V P E Q Q I A Y L S R I O R G G Y I O P F G C M I A V D E - S S F R I G Y S E N A R E M L G I M P - O S V P T L E - - K P E 155  
GRMZM2G092174\_P01 S F D Y S Q S L R A P P T P S - - S E Q Q I A A Y L S R I O R G G H I O P L G C T L A V A D D S S F R L L A F S E N A A D L D L S P H H S V S P L S D S V A L P 155  
GRMZM2G124532\_P03 S F D Y S Q S L R A P P T P S - - S E Q Q I A A Y L S R I O R G G H I O P F G C T L A V A D D S S F R L L A F S E N S P D L L D L S P H H S V S P L S D S A P P 153

Seq 76

AT2G18790.1 I L A M G T D V R S L F T S S S I L L E R A F V A R E I T L L N P W I W H S K N T G K P F F Y A I L H R I D V G V V I D L E P A R T E D P A L S I A G A V O S Q 235  
GRMZM2G092174\_P01 P V S L G A D A R L F S P S S A V L L E R A F A A R E I S L L N P L W I H S R A S S K P F F Y A I L H R I D V G V V I D L E P A R T E D P A L S I A G A V O S Q 235  
GRMZM2G124532\_P03 H V S L G A D A R L F S P S S A V L L E R A F A A R E I S L L N P I W I H S R V S S K P F F Y A I L H R I D V G V V I D L E P A R T E D P A L S I A G A V O S Q 233

AT2G18790.1 K L A V R A I S R L Q A L P G D V K L L C D T V V E S V R D L T G Y D R V M V Y K F H E D E H G E V V A E S R R D N L E P Y L G L H Y P A T D I P Q A S R F L 315  
GRMZM2G092174\_P01 K L A V R A I S R L Q A L P G D V K L L C D T V V E H V R E L T G Y D R V M V Y K F H E D E H G E V V A E S R R D N L E P Y L G L H Y P A T D I P Q A S R F L 315  
GRMZM2G124532\_P03 K L A V R A I S R L Q A L P G D V K L L C D T V V E H V R E L T G Y D R V M V Y R F H E D E H G E V V A E S R R D N L E P Y L G L H Y P A T D I P Q A S R F L 313

AT2G18790.1 F Q K N R V R M I A D C N A T P V R V I Q D D R L T Q S M C L V G S T L R A P H G C H A Q Y M A N M G S I A S L V M A V I I N S G N E D D G S N V A S G R S S M 394  
GRMZM2G092174\_P01 F Q K N R V R M I A D C H A T P V R V I Q D P G L S Q L C L V G S T L R A P H G C H A Q Y M A N M G S I A S L V M A V I I S S G G D D E O T G R G G I S S M 395  
GRMZM2G124532\_P03 F Q K N R V R M I A D C H A T P V R V I Q D P G L S Q P L C L V G S T L R A P H G C H A Q Y M A N M G S I A S L V M A V I I S S G G D D E O T G R G G I S S M 393

AT2G18790.1 R L W G L V V C H H T S R C I P F P L R Y A C E F L M A Q F L Q L N M E L Q L A H Q L S E K R V I L R T Q T L L C D M L L R D S P A G I V T Q S P S I M D L V 474  
GRMZM2G092174\_P01 K L W G L V V C H H T S P R C I P F P L R Y A C E F L M A Q F L Q L N M E L Q L A H Q L S E K H I L R T Q T L L C D M L L R D S P A G I V T Q S P S M D L V 475  
GRMZM2G124532\_P03 K L W G L V V C H H T S P R C I P F P L R Y A C E F L M A Q F L Q L N M E L Q L A H Q L S E K H I L R T Q T L L C D M L L R D S P T G I V T Q S P S I M D L V 473

AT2G18790.1 K C D G A A L Y H G K Y P L G V A P S E V Q I K D V I E W L L A N H A D S T G L S T D S L G D A G Y L G A A A L G D A V C G M A V A Y I T P S D Y L F W F R 554  
GRMZM2G092174\_P01 K C D G A A L Y H G K Y P L G V T P T E S Q I K D I I E W L T V C H A D S T G L S T D S L A D A G Y L G A A A L G D A V C G M A V A Y I T P S D Y L F W F R 555  
GRMZM2G124532\_P03 K C D G A A L Y H G K Y P L G V T P T E S Q I K D I I E W L T V F H A D S T G L S T D S L A D A G Y L G A A A L G E A V C G M A V A Y I T P S D Y L F W F R 553

AT2G18790.1 S H T A K E I K W G G A K H H P E D K D D G O R M H P R S S F Q A F L E V V K S R S P W E T A E M D A I H S L Q L I R D S F K E S - E A A M N S K I V D G V 633  
GRMZM2G092174\_P01 S H T A K E I K W G G A K H H P E D K D D G O R M H P R S S F K A F L E V V K S R S L S W E N A E M D A I H S L Q L I R D S F R D A A E G T S N S K A I V N G 635  
GRMZM2G124532\_P03 S H T A K E I K W G G A K H H P E D K D D G O R M H P R S S F K A F L E V V K S R S L P W E N A E M D A I H S L Q L I R D S F R D A A E G T N N S K A I V N G 633

AT2G18790.1 V O P C R D M A G E Q G I D E L G A V A R E M V R L I E T A T V P I F A V D A G G C I N G W N A K I A E L T G L S V E E A M G K S L V N D L I F K E N E A T V N 713  
GRMZM2G092174\_P01 Q R Q L E L E L R - G I N E L S S V A R E M V R L I E T A T V P I F A V D T D G C I N G W N A K I A E L T G L S V E E A M G K S L V N D L I F K E C D D I V E 714  
GRMZM2G124532\_P03 Q V Q L R E L E L R - G I N E L S S V A R E M V R L I E T A T V P I F A V D T D G C I N G W N A K I A E L T G L S V E E A M G K S L V N D L I F K E S E A T V E 712

AT2G18790.1 K L L S R A L R G E E D K N V E I K L K T F S P E L Q G K A I F V V N A C S S R D Y T Q N I V G V C F V G Q D V T G Q K V M D K F V I N Q G D Y K A I V H S 793  
GRMZM2G092174\_P01 K L L S R A L R G E E D K N V E I K L K T F S E Q S K G A I F V V N A C S S R D Y T Q N I V G V C F V G Q D V T G Q K V M D K F I N I O G D Y K A I V H N 794  
GRMZM2G124532\_P03 K L L S R A L R G E E D K N V E I K L K T F S E Q Y K G P I F V V N A C S S R D Y T Q N I V G V C F V G Q D V T G Q K V M D K F V I N Q G D Y K A I V H N 792

AT2G18790.1 P N P L I P P I F A A D E N T S G L E W N T A M E K L T G W S R S E V I G K M I V G E V F G S C N R L K G P D A L T K F M V I I H N A I G H D T D K F P P F 873  
GRMZM2G092174\_P01 P N P L I P P I F A S D E N T S G S E W N T A M E K L T G W S R E V V G K F L I G E V F G N C O R L K G P D A L T K F M V I I H N A I G H D S K F P P F 874  
GRMZM2G124532\_P03 P N P L I P P I F A S D E N T S G S E W N T A M E K L T G W S R G E V V G K F L I G E V F G N C O R L K G P D A L T K F M V I I H N A I G H D Y E K F P P F 872

AT2G18790.1 F D R N G K F V Q A L L T A N K R V S L E G K V I G A F C F L Q I P S P E L Q Q A L A V Q R R O D T E C F T K A K E L A Y I C Q V I K N P L S G M R F A N S L L 953  
GRMZM2G092174\_P01 F D K N G K Y V Q A L L T A N T R S K M D G K S I G A F C F L Q I A S A E I Q Q A F E I Q R Q E K K C Y A R M K E L A Y I C Q E I K N P L S G I R F T N S L L 954  
GRMZM2G124532\_P03 F D K N G K Y V Q A L L T A N T R S K M D G K S I G A F C F L Q I A S T E I Q Q A F E I Q R Q E K K C Y A R M K E L A Y I C Q E I K N P L S G I R F T N S L L 952

AT2G18790.1 E A T D L N E D Q K Q L L E T S V S C E K Q I S R I V G D M D L E S I E D G S F V L K R E E F F L G S V I N A I V S Q A M F L L R D R G L Q L I R D I P D E I K 1033  
GRMZM2G092174\_P01 Q M T D L N D D R Q R F L E T S S A C E K Q M S K I V K D A S L Q S I E D G S L V L E K S E F S L G D V M N A V S Q T M S L L R E R D L Q L I R D I P D E I K 1034  
GRMZM2G124532\_P03 Q M T D L N D D R Q R F L E T S S A C E K Q M S K I V K D A S L Q S I E D G S L V L E K S E F S L G D V M N A V S Q A M F L L R E R D L Q L I R D I P D E I K 1032

AT2G18790.1 S I E V F G D C I R I Q Q L L A E F L L S I R I Y A P S Q E - W V E I H L S Q L S K Q M A D G F A A I R T E F R M A C P G E L P P E L V R D M F H S S R W T S 1112  
GRMZM2G092174\_P01 D A S A Y G D C F R I Q V L L A D F L L S M A Q S A P S E N G W E I Q V R P N V K Q N Y D G T D E L F I F R F A C P G E L P A D I V O D M F S N S Q W S T 1114  
GRMZM2G124532\_P03 D A S A Y G D C F R I Q Q L L A D F L L S M V R S A P S E N G W E I Q V R P N V K Q N Y D G T D E L F I F R F A C P G E L P A D V V O D M F S N S Q W S T 1112

AT2G18790.1 P E G L G L S V C R K I L K L M N G E V Q Y I R E S E R S Y F L I L E L P V P R K R P L S T A S G S G D M M L M P Y 1172  
GRMZM2G092174\_P01 Q E G V G L S T C R K I L K L M G G E V Q Y I R E S E R S Y F L I L E L P Q P R - - - - L A A G R E N Q L C - - - 1166  
GRMZM2G124532\_P03 Q E G V G L S T C R K I L K L M G G E V Q Y I R E S E R S Y F L I L E L P Q P R - - - - P A A G R E I V - - - - 1161
