# Supplementary material for: Large-scale Proteomic and Phosphoproteomic Analyses of Maize Seedling Leaves During De-etiolation
Source: PubMed Central journal article supplement (PMC8242269; doi:10.1016/j.gpb.2020.12.004), 2020-12-30
Supplement: mmc6.pdf [file mmc6.pdf]

|                   |     |             |             |             |            |             |            |            |              |     |
|-------------------|-----|-------------|-------------|-------------|------------|-------------|------------|------------|--------------|-----|
| AT1G04400.2       | 1   | MKMDKKTIVW  | FRRDLRIEDN  | PALAAAAHEG  | SVFPVFIWCP | EEEGQFYPPGR | ASRWWMKQSL | AHLSQSLKAL | GSDLTLIKTH   | 80  |
| GRMZM2G172152_T01 | 1   | MAGPEKTVVW  | FRRDLRIQDN  | PALAAAAKGG  | SVLPFIWCP  | SDYGQYYPGR  | CSRWWLKQSL | VHLGKSLLEL | GCPLVLIRAE   | 80  |
| GRMZM2G172152_T02 | 1   | - - - - -   | - - - - -   | - - - - -   | - - - - -  | - - - - -   | - - - - -  | - - - - -  | - - - - -    | 1   |
| AT1G04400.2       | 81  | N-TISAILDC  | IRVTGATKVV  | FNHLYDPVSL  | VRDHTVKEKL | VERGISVQSY  | NGDLLYEPWE | IYCEKGGKPF | SFNSYWKKCL   | 159 |
| GRMZM2G172152_T01 | 81  | DSTLAALLEC  | VRSISATRVV  | YNRLYDPIISL | VLDNKIKNEL | PAHGSIQSF   | NGDLLYEPWD | VYDENGQAFT | TFNKYWEKCM   | 160 |
| GRMZM2G172152_T02 | 1   | - - - - -   | - - - - -   | - - - - -   | - - - - -  | - - - - -   | - - - - -  | - - - - -  | - - - - -    | 1   |
| AT1G04400.2       | 160 | DMSIESVMLP  | PPWRLMPITA  | AAEAIVACSI  | EELGLEN-EA | EKPSNALLTR  | AWSPGWSNAD | KLLNEFIEKQ | LIDYAKNSKK   | 238 |
| GRMZM2G172152_T01 | 161 | SLPIEISQYL  | APTRLVAAPG  | LAN-VRCCSI  | DDLGLESSKD | VESSNALLSR  | AWSPGWRNAE | NMLEEFVSYG | LLEYSEHGK    | 239 |
| GRMZM2G172152_T02 | 2   | SLPIEISQYL  | APTRLVAAPG  | LAN-VRCCSI  | DDLGLESSKD | VESSNALLSR  | AWSPGWRNAE | NMLEEFVSYG | LLEYSEHGK    | 80  |
| AT1G04400.2       | 239 | VVGNSTSLLS  | PYLHFGELSV  | RHVFCARMK   | QIWARDKNS  | EGEESADLFL  | RGIGLREYSR | YICFNFPFTH | EQSLLSHLRF   | 318 |
| GRMZM2G172152_T01 | 240 | VGGSTTSLLS  | PYLHFGELSV  | RMIIYQLVKMR | QVQWQNEGKS | EAEESVRLFL  | RSIGFREYSR | YLCFNYPFTH | ERSFLGNLKH   | 319 |
| GRMZM2G172152_T02 | 81  | VGGSTTSLLS  | PYLHFGELSV  | RMIIYQLVKMR | QVQWQNEGKS | EAEESVRLFL  | RSIGFREYSR | YLCFNYPFTH | ERSFLGNLKH   | 160 |
| AT1G04400.2       | 319 | FPWDADVDFK  | KAWRQGRRTGY | PLVDAGMREL  | WATGWMHNR  | RVIVSSFAVK  | FLLPWKWGM  | KYFWDVLLDA | DLECDILGWQ   | 398 |
| GRMZM2G172152_T01 | 320 | YPWLLDEGRF  | KSWRQGMTGY  | PLVDAGMREL  | WATGWTHNR  | RVIVSSFAVK  | FLQIPWIWGM | KYFWDVLLDA | DLESIDLGWQ   | 399 |
| GRMZM2G172152_T02 | 161 | YPWLLDEGRF  | KSWRQGMTGY  | PLVDAGMREL  | WATGWTHNR  | RVIVSSFAVK  | FLQIPWIWGM | KYFWDVLLDA | DLESIDLGWQ   | 240 |
| AT1G04400.2       | 399 | YISGSIIPDGH | ELDRLDNPA   | QGAKYDPEGE  | YIRQWLPELA | RLPTEWIHHP  | WDAPLTVLKA | SGVELGTNYA | KPIVDIDTAR   | 478 |
| GRMZM2G172152_T01 | 400 | YISGSLPDGH  | ELSRLDNPEV  | QGQKYDPDGE  | YVRTWIPELA | RMPTEWIHSP  | WAAPNSILQV | AGVELGFNYP | KPIVELHMAR   | 479 |
| GRMZM2G172152_T02 | 241 | YISGSLPDGH  | ELSRLDNPEV  | QGQKYDPDGE  | YVRTWIPELA | RMPTEWIHSP  | WAAPNSILQV | AGVELGFNYP | KPIVELHMAR   | 320 |
| AT1G04400.2       | 479 | ELLAKAIS--  | RTREAQIMIG  | AAPDEIVADS  | FEALG---A  | NTIKEPGLCP  | SVSSNDQQVP | SAVRYNGSKR | --VKPEEEE    | 549 |
| GRMZM2G172152_T01 | 480 | ECLDDAISTM  | WQLDTAAKLA  | ELDGEVVDDN  | LNNIRNFDIP | KVVLNKKLSP  | STSSMEHRVL | STNGKDEKSQ | PTEVKALYKQ   | 559 |
| GRMZM2G172152_T02 | 321 | ECLDDAISTM  | WQLDTAAKLA  | ELDGEVVDDN  | LNNIRNFDIP | KVVLNKKLSP  | STSSMEHRVL | STNGKDEKSQ | PTEVKALYKQ   | 400 |
| AT1G04400.2       | 550 | ER--DMKKSR  | GFDE---RE   | LFSTAESSSS  | SSVFFV-SQS | CSLASEGKNL  | EG-----    | -----      | -----IQDS-S* | 599 |
| GRMZM2G172152_T01 | 560 | IIRDMMNDS   | NMDDTCSTAN  | LKVTRKRSSS  | DSAFNVPSCS | SSLVMEsrIH  | HNEPSSVLYS | GYFQKTADR  | GTSKVEDNDS   | 639 |
| GRMZM2G172152_T02 | 401 | IIRDMMNDS   | NMDDTCSTAN  | LKVTRKRSSS  | DSAFNVPSCS | SSLVMEsrIH  | HNEPSSVLYS | GYFQKTADR  | GTSKVEDNDS   | 480 |
| AT1G04400.2       | 600 | DQITTSLGKN  | GCK--       |             |            |             |            |            |              | 612 |
| GRMZM2G172152_T01 | 640 | EDSGTISR    | SKKAA       |             |            |             |            |            |              | 654 |
| GRMZM2G172152_T02 | 481 | EDSGTISR    | SKKAA       |             |            |             |            |            |              | 495 |

CCE-domain
