# Supplementary material for: Large-scale Proteomic and Phosphoproteomic Analyses of Maize Seedling Leaves During De-etiolation
Source: PubMed Central journal article supplement (PMC8242269; doi:10.1016/j.gpb.2020.12.004), 2020-12-30
Supplement: mmc7.pdf [file mmc7.pdf]

|                   |     |            |              |               |            |             |             |            |                |     |
|-------------------|-----|------------|--------------|---------------|------------|-------------|-------------|------------|----------------|-----|
| AT5G23060.1       | 1   | MAMAEMATKS | SLSAKLTLPS   | SSTKKTLSLR    | QVSVSLPTST | SISL LSLFAS | PPHEAKAAVS  | IPKDQIVSSL | TEVEKTIINQV    | 80  |
| GRMZM2G122715_T02 | 1   | MAPVPVSVSA | TLAPPPAAP    | KATSRSWERR    | APADAFAAA  | SSVAISAALL  | TLTPAAPAAA  | LSKEDVAGSL | TKAVDTV SQA    | 80  |
| AT5G23060.1       | 81  | QETGSSVFDA | TQRV FQV VGD | ALKPALDTAL    | PIAKQAGEEA | MKLASPAFSE  | ASKKAQEAMQ  | SSGFDSEPVF | NAAKTVTDVA     | 160 |
| GRMZM2G122715_T02 | 81  | IDVGGKAAEQ | VAAVLKALGE   | AVKP - - - AL | PVLKSASDEA | LKLAAPVVSA  | ASKQATEALQ  | GAGVDPAPVL | SVAKTA - - - A | 153 |
| AT5G23060.1       | 161 | QQTSKAIEDA | KPIASSTMDT   | ISSADPSVIV    | VAAGAAFLAY | LLLPVFSAL   | SFNFRGYKGD  | LTPAQTLDDL | CTKNYLMVDI     | 240 |
| GRMZM2G122715_T02 | 154 | EQSTKVIDAA | KPVASAAVET   | ITSLGPEDYV    | VAAGAAFLAY | LLVPPVWSLV  | SSSLRGYKGD  | LTPAQALDKV | TTQGYVLIDV     | 233 |
| AT5G23060.1       | 241 | RSEKDKEKAG | IPRLPSNAKN   | RVISIPLEEL    | PNKVKGIVRN | SKRVEAEIAA  | LKISYLKKIN  | KGSNIILDS  | YTDSAKIVAK     | 320 |
| GRMZM2G122715_T02 | 234 | RSDKDKAKAG | LPQLPSNAKN   | KLVSVPLEDL    | PSKLGKMVRN | AKKAEAEIAA  | LKISYLKKIG  | KGSNVIIMDS | YSDVAKTVAK     | 313 |
| AT5G23060.1       | 321 | TLKVLGYKNC | YIVTDGFSGG   | RGWLQSRLGT    | DSYNFSFAQV | LSPSRIIPAA  | S-RSFGT RSG | - - - - -  | - - - TKFLPS - | 385 |
| GRMZM2G122715_T02 | 314 | TLDSVGFKNC | WVMAGGFSGR   | KGWAQSRLGT    | DSYNLSVVEV | VTPSRVIPAV  | AGRRTGT TAA | RIGTASSASR | ATTRKLLPGG     | 393 |
| AT5G23060.1       | 386 | SD         | 387          |               |            |             |             |            |                |     |
| GRMZM2G122715_T02 | 394 | VD         | 395          |               |            |             |             |            |                |     |
